# Supplementary material for: A facile route to synthesize n-SnO2/p-CuFe2O4 to rapidly degrade toxic methylene blue dye under natural sunlight
Source: Royal Society of Chemistry journal article supplement (doi:10.1039/d2ra01690g), 2022-01-01
Supplement: d2ra01690g1.pdf [file d2ra01690g1.pdf]

**A facile route to synthesize n-SnO<sub>2</sub>/p-CuFe<sub>2</sub>O<sub>4</sub> complex to rapidly degrade the toxic Methylene Blue dye under natural sunlight**

Kaijiao Duan<sup>1</sup>, Tingting Que<sup>1</sup>, Sivasankar Koppala<sup>2\*</sup>, Ramdas Balan<sup>3\*</sup>, Budigi Lokesh<sup>4</sup>, Rahul Pillai<sup>5,6</sup>, Selvaraj David<sup>7</sup>, Parasuraman Karthikeyan<sup>8</sup>, Sangeetha Ramamoorthy<sup>5,6</sup>, I C Lekshmi<sup>5</sup>, Patiya Kemacheevakul<sup>9</sup>, Nagarajan Padmavathy<sup>10</sup>, Sathishkumar Munusamy<sup>11</sup>

<sup>1</sup>School of Chemistry and Environment, Yunnan Minzu University, Kunming 650505, Yunnan, China

<sup>2</sup>Saveetha School of Engineering, Saveetha Institute of Medical and Technical Sciences (SIMATS), Chennai 602105, Tamil Nadu, India

<sup>3</sup>Department of Physics, CMR Institute of Technology, Bengaluru 560037, Karnataka, India

<sup>4</sup>Department of Chemistry, MVJ College of Engineering, Bengaluru 560067, Karnataka, India

<sup>5</sup>CoE Materials Science/Sensors & Nanoelectronics, Department of Chemistry, CMR Institute of Technology, Bengaluru 560037, Karnataka, India

<sup>6</sup>VTU-Research Centre affiliated to Visvesvaraya Technological University, Belagavi 590018, Karnataka, India

<sup>7</sup>Department of Chemistry, Periyar University, Salem 636011, Tamilnadu, India

<sup>8</sup>PG and Research Department of Chemistry, Pachaiyappas College, University of Madras, Chennai 600030, Tamilnadu, India

<sup>9</sup>Department of Environmental Engineering, Faculty of Engineering, King Mongkut's University of Technology Thonburi, Bangkok 10140, Thailand

<sup>10</sup>Department of Materials Engineering, Indian Institute of Science, Bengaluru 560012, India

<sup>11</sup>Department of Chemistry, Faculty of Science, Chulalongkorn University, Pathumwan, 10330, Bangkok, Thailand

\*Corresponding Author: Sivasankar Koppala ([pepsiva9@gmail.com](mailto:pepsiva9@gmail.com)) and Ramdas Balan ([balan.ramdas@gmail.com](mailto:balan.ramdas@gmail.com))

## Electronic supporting information

### List of Figures

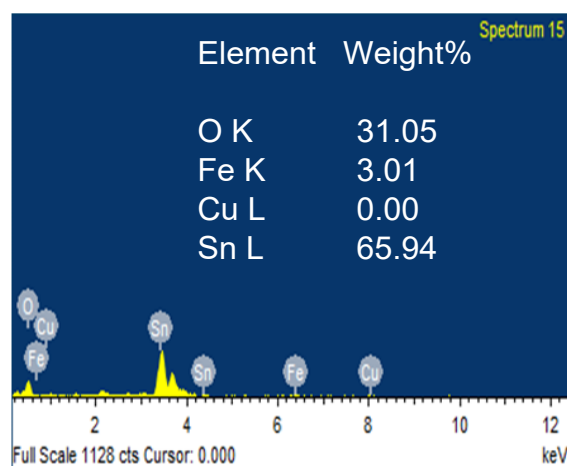

**Fig.S1.** EDX spectrum of n-SnO<sub>2</sub>/p-CFO

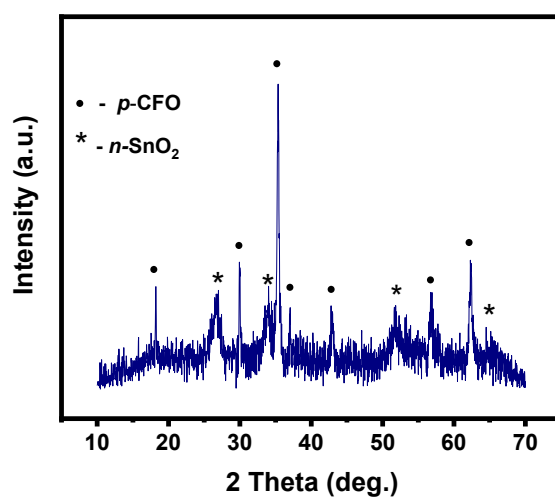

**Fig.S2.** XRD pattern of the used catalyst after 5 cycles

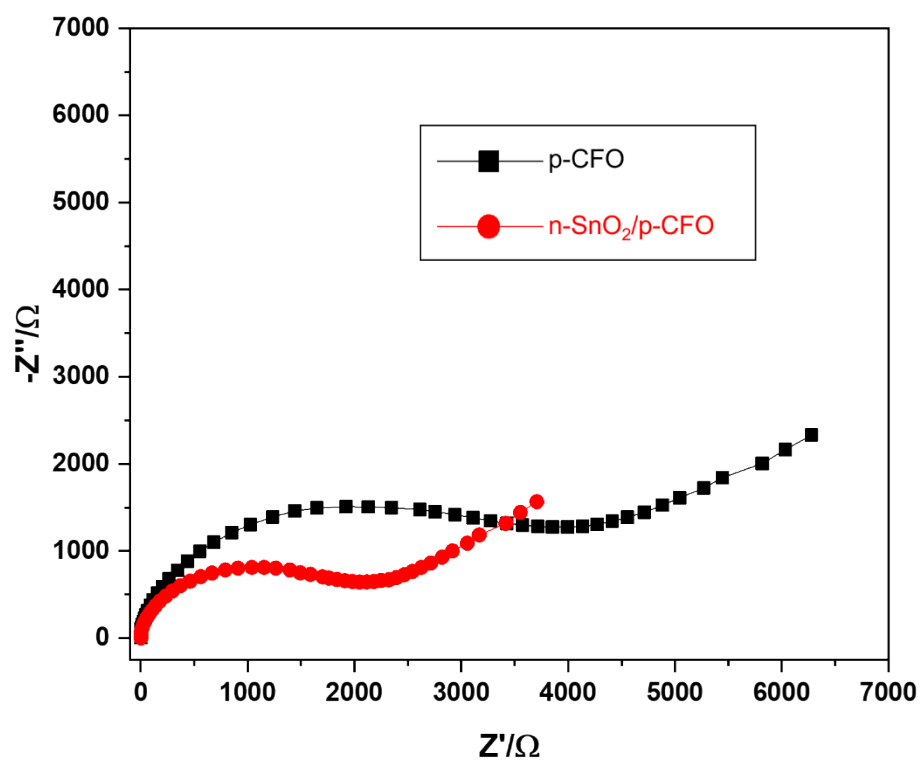

**Fig. S3.** Electrochemical Impedance spectroscopy (EIS) to probe the charge-transfer process of (a) p-CFO and (b) n-SnO<sub>2</sub>/p-CFO
